# Supplementary material for: Ophthalmology Residents’ Experience in Cataract Surgery: Preoperative Risk Factors, Intraoperative Complications, and Surgical Outcomes
Source: Springer Nature journal article supplement (doi:10.1007/s40123-024-00947-6), 2024-05-02
Supplement: MOESM1 [file 27046844]

## **Supplementary Material**

### **Ophthalmology Residents Experience in Cataract Surgery: Pre-Operative Risk Factors, Intraoperative Complications and Surgery Outcomes**

Yaacov Cnaany<sup>1\*</sup>, Ayelet Goldstein<sup>2\*</sup>, Itay Lavy<sup>1</sup>, Michael Halpert<sup>1</sup>, Itay Chowers<sup>1</sup>, Hadas Ben-Eli<sup>1,3</sup>

<sup>1</sup>*Department of Ophthalmology, Hadassah-Hebrew University Medical Center, Jerusalem, Israel*

<sup>2</sup>*Department of Computer Science, Hadassah Academic College, Jerusalem, Israel*

<sup>3</sup>*Department of Optometry and Vision Science, Hadassah Academic College, Jerusalem, Israel*

\* These authors contributed equally to this work

Corresponding author: Hadas Ben-Eli, POB 12000, Jerusalem, Israel, 91120. Tel: +972-50-

4638006. E-mail: [hadassen@hadassah.org.il](mailto:hadassen@hadassah.org.il) , [hadassen@hac.ac.il](mailto:hadassen@hac.ac.il)

<https://orcid.org/0000-0002-2832-4221>

**Table S1- Comparison of incidence of complications between populations with and without risk factors. Including only cohorts with size >=25.**

| Cohorts:                                | Posterior Capsule Tear | Vitreous Loss | Dropped Lens | Anterior Capsule tear | Iris prolapse | Fiber Loss | Hyphema | Membrane Damage | IOL           | Cut Leak | ECCE2         | Any complication |
|-----------------------------------------|------------------------|---------------|--------------|-----------------------|---------------|------------|---------|-----------------|---------------|----------|---------------|------------------|
| <b>Small Pupil (n=104)</b>              | 9 (9%)                 | 7 (7%)        | 1 (1%)       | 1 (1%)                | 2 (2%)        | 2 (2%)     | 0 (0%)  | 1 (1%)          | 0 (0%)        | 5 (5%)   | 2 (2%)        | 18 (17%)         |
| <b>Without Small Pupil (n=587)</b>      | 51 (9%)                | 27 (5%)       | 6 (1%)       | 10 (2%)               | 7 (1%)        | 4 (1%)     | 1 (0%)  | 1 (0%)          | 1 (0%)        | 8 (1%)   | 1 (<1%)       | 75 (13%)         |
| <b>p-value</b>                          | 0.99                   | 0.35          | 0.95         | 0.57                  | 0.54          | 0.20       | 0.67    | 0.16            | 0.67          | 0.01     | 0.01          | 0.21             |
| <b>Oral Alpha (n=88)</b>                | 9 (10%)                | 5 (6%)        | 1 (1%)       | 1 (1%)                | 2 (2%)        | 1 (1%)     | 1 (1%)  | 0 (0%)          | 0 (0%)        | 3 (3%)   | 0 (0%)        | 5 (10%)          |
| <b>Without Oral Alpha (n=603)</b>       | 51 (8%)                | 29 (5%)       | 6 (1%)       | 10 (2%)               | 7 (1%)        | 5 (1%)     | 0 (0%)  | 2 (0%)          | 1 (0%)        | 10 (2%)  | 3 (<1%)       | 88 (14%)         |
| <b>p-value</b>                          | 0.58                   | 0.72          | 0.90         | 0.71                  | 0.39          | 0.77       | 0.009   | 0.58            | 0.70          | 0.25     | 0.62          | 0.39             |
| <b>DR (n=52)</b>                        | 3 (6%)                 | 2 (4%)        | 0 (0%)       | 3 (6%)                | 0 (0%)        | 0 (0%)     | 0 (0%)  | 0 (0%)          | 1 (2%)        | 0 (0%)   | 2 (1%)        | 28 (14%)         |
| <b>Without DR (n=639)</b>               | 57 (9%)                | 32 (5%)       | 7 (1%)       | 8 (1%)                | 9 (1%)        | 6 (1%)     | 1 (0%)  | 2 (0%)          | 0 (0%)        | 13 (2%)  | 1 (<1%)       | 65 (13%)         |
| <b>p-value</b>                          | 0.43                   | 0.70          | 0.44         | 0.012                 | 0.39          | 0.48       | 0.77    | 0.68            | <b>0.0005</b> | 0.29     | 0.13          | 0.63             |
| <b>Poor Cooperation (n=194)</b>         | 16 (8%)                | 11 (6%)       | 3 (2%)       | 6 (3%)                | 3 (2%)        | 1 (1%)     | 0 (0%)  | 1 (1%)          | 1 (1%)        | 2 (1%)   | 0 (0%)        | 14 (16%)         |
| <b>Without Poor Cooperation (n=497)</b> | 44 (9%)                | 23 (5%)       | 4 (1%)       | 5 (1%)                | 6 (1%)        | 5 (1%)     | 1 (0%)  | 1 (0%)          | 0 (0%)        | 11 (2%)  | 3 (<1%)       | 79 (13%)         |
| <b>p-value</b>                          | 0.79                   | 0.57          | 0.38         | 0.049                 | 0.72          | 0.53       | 0.53    | 0.48            | 0.10          | 0.30     | 0.50          | 0.47             |
| <b>Shallow (n=27)</b>                   | 1 (4%)                 | 0 (0%)        | 0 (0%)       | 0 (0%)                | 0 (0%)        | 1 (4%)     | 0 (0%)  | 0 (0%)          | 0 (0%)        | 1 (4%)   | 0 (0%)        | 5 (20%)          |
| <b>Without Shallow (n=664)</b>          | 59 (9%)                | 34 (5%)       | 7 (1%)       | 11 (2%)               | 9 (1%)        | 5 (1%)     | 1 (0%)  | 2 (0%)          | 1 (0%)        | 12 (2%)  | 3 (<1%)       | 88 (13%)         |
| <b>p-value</b>                          | 0.34                   | 0.22          | 0.59         | 0.50                  | 0.54          | 0.10       | 0.84    | 0.77            | 0.84          | 0.47     | 0.73          | 0.32             |
| <b>Phacodonesis (n=25)</b>              | 3 (12%)                | 3 (12%)       | 0 (0%)       | 0 (0%)                | 1 (4%)        | 1 (4%)     | 0 (0%)  | 0 (0%)          | 0 (0%)        | 0 (0%)   | 2 (<1%)       | 47 (14%)         |
| <b>Without Phacodonesis (n=666)</b>     | 57 (9%)                | 31 (5%)       | 7 (1%)       | 11 (2%)               | 8 (1%)        | 5 (1%)     | 1 (0%)  | 2 (0%)          | 1 (0%)        | 13 (2%)  | 1 (<1%)       | 46 (13%)         |
| <b>p-value</b>                          | 0.54                   | 0.09          | 0.60         | 0.51                  | 0.22          | 0.08       | 0.84    | 0.78            | 0.84          | 0.48     | 0.54          | 0.75             |
| <b>One or less RF (n=262)</b>           | 47 (8%)                | 24 (4%)       | 5 (1%)       | 7 (1%)                | 7 (1%)        | 4 (1%)     | 1 (0%)  | 1 (0%)          | 0 (0%)        | 9 (2%)   | 1 (<1%)       | 69 (12%)         |
| <b>Two or more RFs (n=429)</b>          | 13 (11%)               | 10 (9%)       | 2 (2%)       | 4 (3%)                | 2 (2%)        | 2 (2%)     | 0 (0%)  | 1 (0%)          | 1 (1%)        | 4 (3%)   | 2 (2%)        | 21 (18%)         |
| <b>p-value</b>                          | 0.28                   | 0.043         | 0.40         | 0.07                  | 0.66          | 0.27       | 0.65    | 0.20            | 0.02          | 0.17     | <b>0.0205</b> | 0.07             |
| <b>Any RF (n=302)</b>                   | 28 (8%)                | 17 (5%)       | 3 (1%)       | 7 (2%)                | 5 (1%)        | 3 (1%)     | 1 (0%)  | 1 (0%)          | 1 (0%)        | 6 (2%)   | 0 (0%)        | 2 (7%)           |
| <b>No RF (n=389)</b>                    | 32 (9%)                | 17 (5%)       | 4 (1%)       | 4 (1%)                | 4 (1%)        | 3 (1%)     | 0 (0%)  | 1 (0%)          | 0 (0%)        | 7 (2%)   | 3 (<1%)       | 91 (14%)         |
| <b>p-value</b>                          | 0.69                   | 0.91          | 0.74         | 0.32                  | 0.69          | 0.96       | 0.30    | 0.97            | 0.30          | 0.83     | 0.72          | 0.34             |

\* The Z-proportion test was used. Bonferroni correction was applied, setting the significance threshold at  $p < 0.008$  (0.05/6). Significant differences are highlighted in bold. Aggregative features, such as any RF, one or less and two or more RFs, were not included in the Bonferroni adjustment. RF= Risk factor, DR=Diabetic Retinopathy, IOL= Intraocular lens, ECCE=Extracapsular cataract extraction
